## Peptide sequencing in an electrolytic cell with two nanopores in tandem and exopeptidase

G. Sampath<sup>1</sup>

**Abstract.** A nanopore-based approach to peptide sequencing without labels or immobilization is considered. It is based on a tandem cell (*RSC Adv.*, 2015, **5**, 167-171) with the structure [*cis*1, upstream pore (UNP), *trans*1/*cis*2, downstream pore (DNP), *trans*2]. An amino or carboxyl exopeptidase attached to the downstream side of UNP cleaves successive leading residues in a peptide threading from *cis*1 through UNP, followed by a cleaved residue translocating to and through DNP where it is identified. A Fokker-Planck model is used to compute translocation statistics for each amino acid type. Multiple discriminators, including the current blockade level (or a variant thereof) and translocation times through *trans*1/*cis*2 and DNP, are used to identify a residue. Calculations show the 20 amino acids to be grouped by charge (positive, negative, neutral) and ordered within each group. The ordering makes error correction easier because an incorrectly called residue need only be replaced with its nearest neighbor in the order. The minimum cleaving interval required of the exopeptidase, the sample size (number of copies of the peptide to sequence or number of runs with one copy) to identify a residue with a given confidence level, and confidence levels for a given sample size are calculated. The results suggest that if the exopeptidase cleaves every residue and does so in a reasonable amount of time, peptide sequencing with acceptable (and correctable) errors may be feasible. If validated experimentally the proposed device could be an alternative to mass spectrometry and gel electrophoresis. Implementation-related issues are discussed.

### 1. Introduction

In nanopore sequencing, an analyte (usually a polymer) translocates through a biological nanopore embedded in a bilipid membrane (or a hole drilled through a synthetic one) separating the *cis* and *trans* chambers in an electrolytic cell with an aqueous solution of KCl and a potential difference between the two chambers. The resulting ionic current blockade is used to identify the analyte (or its components) as it passes through the pore. Instead of a pore in a membrane a graphene sheet or layer of molybdenum sulphide containing a nano-sized hole may also be used, with a transverse current passing through the analyte and a pair of transverse electrodes being used to identify monomers. In 'strand sequencing' [1] of DNA the analyte is a charged DNA molecule, in 'exosequencing' [2] it is charged bases (actually mononucleotides) cleaved by an exonuclease adjacent to the pore in *cis*. Nanopore-based sequencing of single- or double-stranded DNA (ss- or ds-DNA) has been studied extensively (see review [3]), with one implementation close to market [4]. In contrast, sequencing of proteins or peptide strands using nanopores is still in an early stage [5], in part because the problems it faces are much more severe than those in DNA sequencing.

This report looks at the possibility of a nanopore-based method to sequence a peptide. It is centered on a modified version of a tandem electrolytic cell previously proposed for DNA sequencing and modeled mathematically [6]. That model is extended to the modified tandem cell, whose analysis suggests that peptide sequencing with a nanopore may be a feasible proposition, provided the exopeptidase functions as required by the proposed method. The original version has two pores in tandem with an exonuclease attached to the downstream side of the first pore. The enzyme is designed to cleave the leading base from a single strand of DNA that is drawn into the pore by a potential difference across the cell. The cleaved base translocates through the second pore and is detected based on the current blockade it causes there. The cell considered here is similar, with an exopeptidase in place of the exonuclease to successively cleave leading amino acids (or residues, the two terms are used interchangeably below) in the chain of amino acids. Sequence identification is based on the use of multiple discriminators, including a variant of the current blockade level and the translocation times of a cleaved residue through *trans*1/*cis*2 and DNP. If experimentally validated this approach can lead to a feasible alternative to mass spectrometry (ESI/MALDI) [7] and gel electrophoresis [8].

The following summarizes the content of this report. Section 2 presents a brief review of nanopore-related studies of proteins/peptides and the potential use of nanopores in peptide sequencing. Section 3 describes a tandem cell with exopeptidase for sequencing a peptide without any labels or immobilization. Section 4 presents results from a mathematical model based on [6]. Section 5 presents an analysis of the model and discusses conditions for effective peptide sequencing with a tandem cell. Among other things, it examines the use of multiple discriminators to enable identification of more monomer types than previously considered, as well as necessary conditions for residues to be sequenced in the correct order. Section 6 looks at a range of implementation issues. An Appendix contains tables of calculated data.

---

<sup>1</sup> Email: [sampath\\_2068@yahoo.com](mailto:sampath_2068@yahoo.com)

## 2. Nanopores for peptide sequencing

Most protein sequencing (more correctly peptide sequencing) is currently based on peptide ionization and mass spectrometry (ESI/MALDI) [7] or gel electrophoresis [8]. In recent years there has been an increasing number of investigations based on the use of nanopores for peptide identification and analysis. Most of this work does not involve residue-level sequencing but is concerned with other aspects such as protein unfolding [9], identification of whole proteins [10] or domains within [11], detecting modifications such as phosphorylation [12], or conformation studies [13]. A recent report [14] describes the use of transverse electrodes and residue-specific detector molecules attached to the lumen of the pore to measure a transverse tunneling current passing through a single amino acid in the peptide. The value of this current is then used with a machine learning algorithm to identify the sequence of amino acids crossing the junction.

In general any attempt to sequence proteins using nanopores has to consider the following: 1) unlike DNA, which carries a negative electric charge in its backbone, only 5 of the 20 individual amino acids that make up proteins are charged (2 of them are negative, 3 are positive), the other 15 being neutral [8]; therefore depending on the sequence a peptide may carry only a small effective charge, which may not be sufficient to move or enable easy detection in an electric field; 2) proteins in their native state have secondary and tertiary folds and therefore need to be unfolded before sequencing can begin (ds-DNA has a similar unzipping problem, which can be resolved with a nanopore [15]); 3) runs of identical residues (homopolymers) are not easily resolved (this is also a problem for strand sequencing of DNA); 4) proteins are not easily replicated; in comparison DNA can be reproduced in large amounts (ideally  $2^n$  copies in  $n$  steps) using the polymerase chain reaction (PCR) [8]; 5) if the sequencing is based on cleaving of a strand the original sequence is not easily reconstructed, whereas in exonuclease sequencing of ss-DNA [2,6] re-sequencing the DNA strand using the individual cleaved nucleotides and a template requires only a single enzyme motor attached to a nanopore [16]; and 6) attempts to use methods similar to those in DNA sequencing in which Markov-Viterbi models or neural-net-based algorithms [17,18] are used to identify bases from the current signal due to a segment of  $k$  bases ( $k$ -mer) rather than a single base have to contend with the much larger number of amino acid types (20 versus 4 in DNA); thus with  $k=2$  the number of blockade levels to distinguish is 400 (compared with 16 in DNA), and 160000 with  $k=4$  (compared with 256 in DNA).

Some of the above problems can be alleviated: 1) neutral molecules can be made mobile in an electric field if a hydraulic pressure gradient is added [19-21]; 2) folded proteins can be unfolded using a nanopore [9]; 3) the homopolymer problem can be solved in part by breaking up the peptide into individual residues so that the identification of each residue is, generally speaking, not influenced by its neighbors in the chain (similar to exonuclease sequencing of DNA [2] with the tandem cell [6]) because the ionic current returns to the baseline value between successive residues; and 4) multiple discriminators based on different measured data may be used to identify a larger number of monomer types (than the 4 in DNA). The next section describes a modified tandem cell for peptide sequencing based on some of these notions.

## 3. A tandem cell for sequencing a peptide strand

Figure 1 shows a schematic of the modified tandem cell that is based on the generic form [*cis*1, upstream pore (UNP), *trans*1/*cis*2, downstream pore (DNP), *trans*2] [6] and has a similar geometry. An exopeptidase (amino or carboxyl) is attached to the downstream side of UNP. A potential difference  $V_{05}$  (normally  $> 0$ ) is applied between *cis*1 and *trans*2 over the five sections, with most of it ( $\sim 98\%$ ) dropping across the two pores [3].

Translocation of analyte molecules in the tandem cell is primarily based on diffusion supplemented by drift due to the electric field  $E$  resulting from  $V$ . The diffusion-drift process can be modeled with a Fokker-Planck equation, and the mean and standard deviation of the times taken by the particle to translocate through a chamber (*cis* or *trans*) and through a pore calculated. With the  $z$  axis parallel to the pore axis and directed from *cis*1 to *trans*2, a negatively charged particle experiences a positive drift velocity  $v_z$  due to  $E$ , which reduces mean translocation time. If it is positively charged the drift is in the opposite direction, and the mean translocation time increases. The field has no effect on neutral residues.

The behavior of the proposed structure can be described as follows. A peptide with a poly- $X$ , where  $X =$  negatively or positively charged amino acid ( $X^- =$  Glu or Asp;  $X^+ =$  Lys, Arg, or His), leader and trailer to induce entry into UNP ( $V_5 > V_0$  or  $V_5 < V_0$  respectively), is drawn into UNP when  $|V_{05}|$  is sufficiently large (about 200-400 mV typically; see Figure 7 in [3]), and translocates through UNP to encounter the exopeptidase

attached to the downstream side of UNP. If the exopeptidase is amino exopeptidase then the leading residues at the N-terminal of the chain are cleaved one after the other. With carboxyl exopeptidase the cleaving is at the C-terminal. (The incorrect end could enter UNP, Section 6 considers how this could be resolved.) A non-zero potential difference between *trans1/cis2* and *trans2* causes ionic current to flow through DNP. A cleaved residue passes through DNP under the influence of  $V_{34}$  and/or diffusion, causing a blockade of the ionic current. By measuring the blockade current level through DNP, the mean inter-arrival time ( $\approx E(T_{trans1/cis2})$ ) between successive cleaved residues arriving at DNP, and the mean residence time of the cleaved residue inside DNP ( $\approx E(T_{DNP})$ ) a residue can in principle be identified using these three discriminators (or suitably modified versions thereof). (This ignores interactions with the pore lumen and the effect of a chemical adapter [22] used for slowdown.)

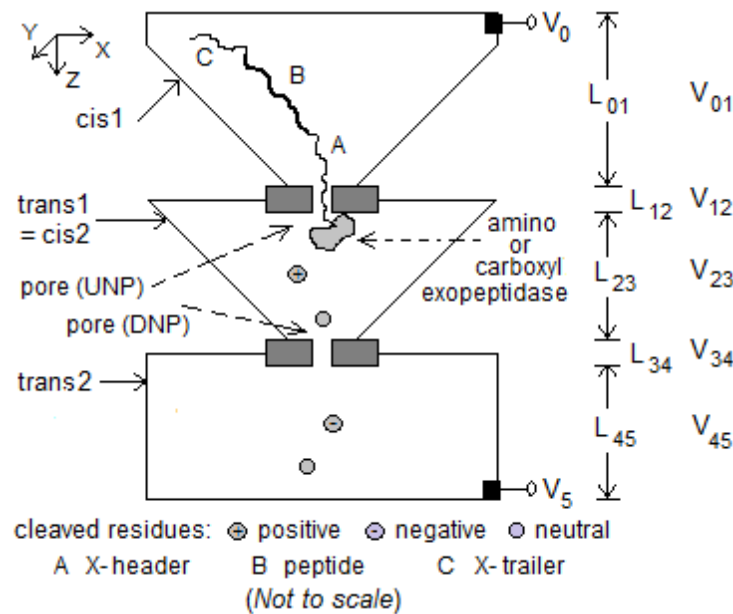

**Figure 1.** Schematic of modified tandem cell for peptide sequencing with five pipelined stages. Dimensions considered: 1) *cis1*: box of height 1  $\mu\text{m}$  tapering to cross-section 100  $\text{nm}^2$ ; 2) UNP: length 10-20 nm, diameter 10 nm; 3) *trans1/cis2*: box of height 1  $\mu\text{m}$  tapering from 1  $\mu\text{m}^2$  cross-section to 10  $\text{nm}^2$ ; 4) DNP: length 10-20 nm, diameter 3 nm; 5) *trans2*: box of height 1  $\mu\text{m}$ , side 1  $\mu\text{m}$ . Exopeptidase covalently attached to downstream side of UNP. Electrodes at top of *cis1* and bottom of *trans2*.  $V_{05} \approx 0.4$  V.

#### 4. Mathematical model

The mathematical model for the tandem cell here is very similar to that for the tandem cell proposed for exosequencing of DNA [6]. Similar to a mononucleotide in the original tandem cell, a residue is considered to be a particle that does not interact chemically with the pore lumen or the electrolyte and moves after being cleaved by the exopeptidase through a combination of diffusion and electric drift. With most of the potential difference  $V_{05}$  dropping across the two pores ( $V_{05} = 0.365$  V,  $V_{23} = 1.6$  mV,  $V_{34} = \sim 0.18$  V), movement of a cleaved residue through *trans1/cis2*, DNP, and *trans2* is dominated by diffusion. The movement through *trans1/cis2* and DNP can be studied via the trajectory of a particle whose propagator function  $G(x, y, z, t)$  is given by a linear Fokker-Planck (F-P) in one dimension ( $z$ ) for DNP, or three ( $x, y, z$ ) for *trans1/cis2*, containing a drift term in the  $z$  direction that arises from the voltage difference  $V_{05}$ . The drift field affects charged residues but not neutral residues. A piecewise approach is taken, with each section considered independent of the others. The behavior at the interface between two sections is examined in Section 5.4.

##### 4.1 Solution of the one-dimensional case

The F-P equation in the one-dimensional case can be solved in a straightforward way using methods from partial differentiation equations and Laplace transforms. Let  $\mu$  be the mobility of the particle and  $D$  its diffusion constant. Following [6], the mean  $E(T)$  and variance  $\sigma^2(T)$  of the translocation time  $T$  over a channel of length  $L$  that is reflective at the top and absorptive at the bottom with applied potential difference of  $V$  are given by

$$E(T) = (L^2/D\alpha)[1 - (1/\alpha)(1 - \exp(-\alpha))] \quad (1)$$

and

$$\sigma^2(T) = (L^2/D\alpha^2)(2\alpha + 4\alpha\exp(-\alpha) - 5 + 4\exp(-\alpha) + \exp(-2\alpha)) \quad (2)$$

where

$$\alpha = v_z L/D \quad v_z = \mu V/L \quad (3)$$

Here  $v_z$  is the drift velocity due to the electrophoretic force experienced by a charged particle in the  $z$  direction. For  $v_z = 0$ , these two statistics are

$$E_0(T) = L^2/2D; \quad \sigma_0^2(T) = (1/6)(L^4/D^2) \quad (4)$$

As discussed below, these formulas can be applied to all three chambers: *trans1/cis2* ( $T = T_{trans1/cis2}$ ;  $L = L_{23}$ ), DNP ( $T = T_{DNP}$ ;  $L = L_{34}$ ), and *trans2* ( $T = T_{trans2}$ ;  $L = L_{45}$ ). The characteristics of each chamber in the model are discussed next.

#### 4.2 Characteristics of translocation of a residue

1) *Translocation of cleaved residue through DNP*. A cleaved residue is treated as a particle that is released at the top of DNP at  $t = 0$ , reflected there at  $t > 0$ , and 'captured' at the bottom at  $t > 0$ . Regardless of whether a residue is charged or not the diffusion is always in the  $z$  direction because of the reflecting barrier at  $z = 0$ . With  $V_{05} > 0$   $\alpha$  is positive for negative residues and negative for positive residues. The resulting translocation time mean for negative residues is reduced below that due to  $v_z = 0$ , and goes above for positive residues. In both cases the net translocation is in the positive  $z$  direction for the values of  $V_{05}$  in use. The electric field has no effect on neutral residues and their movement is entirely due to diffusion; therefore  $\alpha = 0$  for them. In summary all residues, charged or not, will move in the  $z$  direction and cause a current blockade in DNP; this, along with other measures (see Section 5.1), can be used to identify a residue. Equations 1 through 4 apply with  $L = L_{34}$ .

2) *Translocation of cleaved residue through trans1/cis2*. This is modeled in three dimensions using a rectangular box-shaped region. (The tapered geometry of Figure 1 is discussed in Section 5.4.) A particle is released at the top center of *trans1/cis2* at  $t = 0$ , reflected at the top and sides of the box at  $t > 0$ , and translocates to the bottom of the compartment where it is 'absorbed' at some  $t > 0$ . That is, the particle is considered to be detected when it reaches  $z = L_{23}$  independent of  $x$  and  $y$  and to move into DNP without regressing into *trans1/cis2*. The propagator function  $G(x,y,z,t)$  can be written as the product of three independent propagator functions. It is shown in [6] that diffusion in the  $x$  and  $y$  directions has no effect on  $G(x,y,z,t)$  so that the first passage time distribution in the three dimensional case reduces to that in the one-dimensional case. Thus Equations 1 through 4 apply with  $L = L_{23}$ . The effect of  $\alpha$  on charged and neutral residues is the same as in DNP.

3) *Translocation of cleaved residue through trans2*. This behavior can be modeled in the same way as that of a cleaved residue in *trans1/cis2*.

### 5. Analysis and computational results

The ability of the tandem cell to correctly identify residues cleaved from a peptide depends on the following conditions being satisfied:

- 1) The tandem cell must be able to discriminate among 20 types of residues;
- 2) Residues must not be lost to diffusion;
- 3) Residues must arrive in sequence order at DNP;
- 4) More than one residue must not occupy DNP at any time.

Conditions 2 through 4 also serve to define the minimum interval required between successively cleaved residues in the peptide; this is discussed in Section 5.3.

#### 5.1 Discriminating among the residue types using multiple discriminators

Most sequencing studies (see review [3]) focus on the current blockade when discriminating among monomer types. In sequencing of single strands of DNA higher-level correlations among the bases in a k-mer are extracted by complex algorithms from the current record to improve base calling [17,18]. If sequencing is based on a graphene sheet with a hole for the nanopore the discriminator used is the transverse current passing through the analyte and a pair of transverse electrodes [23]. Although the residence time of an analyte in a pore has been modeled and studied extensively most studies do not use it as a discriminator and are mainly from the perspective of slowing down translocation to decrease the detection bandwidth.

By using multiple discriminators in the recorded signal it may be possible to better distinguish among monomer types and/or increase the number of types that can be identified. Thus going beyond the current blockade, analyte-specific information may also be found in the times taken for a molecule or cleaved monomer to travel to a pore and through the pore. In a tandem cell both these times (or their variants) are clearly defined (translocation from top center of *trans1/cis2* to DNP and translocation through DNP) and can be measured. Thus three discriminators, namely the mean blockade current ratio  $\langle I/I_0 \rangle$  (where  $I$  and  $I_0$  are the currents with and without analyte in the pore), the mean translocation time  $E(T_{trans1/cis2})$  from top center of *trans1/cis2* to the entrance of DNP, and the mean residence time  $E(T_{DNP})$  in DNP, can in principle be used in combination for analyte identification in a tandem cell. Computation of these three discriminators is considered next.

a) *Current blockade level inside DNP and volume excluded in a pore by an analyte particle (monomer)*

Current blockade is defined by the mean blockade current ratio  $\langle I/I_0 \rangle$ . For polymer sequencing based on current blockades to work there must be an ionic current (due to  $K^+$  and  $Cl^-$ ) between *trans1/cis2* and *trans2*; thus  $V_{34}$  cannot be 0. The blockade level is influenced by many factors, one of which is volume exclusion whereby the particle reduces the pore volume available for ionic current flow. The volume exclusion ratio (VER) is defined as volume excluded/pore volume:  $V_{excl}/V_{pore}$ . The particle is treated as a cylinder of radius equal to the particle's hydro-dynamic radius  $R_H$  and height  $2R_H$ , the pore is a cylinder of radius  $r$  and length  $L$ . The VER is given by

$$V_{excl}/V_{pore} = 1 - L(A_{pore} - A_{residue}) / (L(A_{pore} - A_{residue}) + 2R_H A_{residue}) \quad (5)$$

where the  $A$ 's are cross-section areas. Although it typically contributes only a small fraction to the blockade ratio  $\langle I/I_0 \rangle$ , here the VER is used as a placeholder and included in the discussion below for the purpose of studying the efficacy of multiple discriminators. It may be replaced with  $\langle I/I_0 \rangle$  when experimentally obtained or theoretically calculated values for  $\langle I/I_0 \rangle$  become available, after which the model can be revised as appropriate.

b) *Translocation time through DNP*. This is a function of the diffusion constant  $D_{aa}$  for an amino acid, its hydrodynamic radius  $R_{H-aa}$ , and the drift velocity  $v_z$  if the residue is charged. It is also influenced by the selectivity of the pore for anions or cations (see discussion in Section 6). Additionally the translocation can be slowed down if a chemical adapter is used [22]. The mean and standard deviation of the translocation time are given by Equations 1 through 4.

c) *Translocation time through trans1/cis2*. The dependence on physical-chemical properties is similar to (b).

The statistics of the two translocation times for each amino acid can be calculated using Equations 1 through 4, with  $D$  and  $\mu$  for an amino acid given by

$$D_{aa} = k_B T_R / 6\pi\eta R_{aa} \quad \mu_{aa} = q / 6\pi\eta R_{aa} \quad (6)$$

Here  $k_B$  is the Boltzmann constant ( $1.3806 \times 10^{-23}$  J/K),  $T_R$  is the room temperature (298° K),  $\eta$  is the solvent viscosity (0.001 Pa.s),  $R_{aa}$  the hydrodynamic radius of an amino acid (usually given in angstrom ( $\text{\AA} = 10^{-10}$  m)), and  $q$  is the electron charge ( $1.619 \times 10^{-19}$  coulomb). Values of  $R_{aa}$  are taken from [24].

## 5.2 Computational results

Figure 2 is a scatter diagram of  $E(T_{DNP})$  vs  $V_{excl} / V_{DNP}$ , while Figure 3 relates  $E(T_{DNP})$  and  $E(T_{trans1/cis2})$ . (Calculated data can be found in Table 1 in the Appendix.) In both cases a grouping of the amino acids by electric charge (+, -, neutral) is evident, and within each group there is a monotonic ordering of the residues. The ordering property is especially useful because error correction merely requires an incorrect call to be replaced with the nearest neighbor in the ordering. (Error correction may also be enhanced by methods similar to those used in mass-

spectrometry-based peptide sequencing in which pattern recognition techniques and/or correlation analysis are used with a protein sequence database to fix unknowns in a peptide fragmentation spectrum [7].) Furthermore, if the voltage  $V_{05}$  is reversed the negative and positive residues reverse position in both charts; this property can be used to advantage in sequencing as discussed below. (As an aside, a comparison with the amino acid separation spectrum obtained from ion mobility spectrometry [25], which shows a strict ordering of the amino acids over drift time (with values in the milliseconds range), reveals similar tendencies between the two orderings and some overlapping segments.)

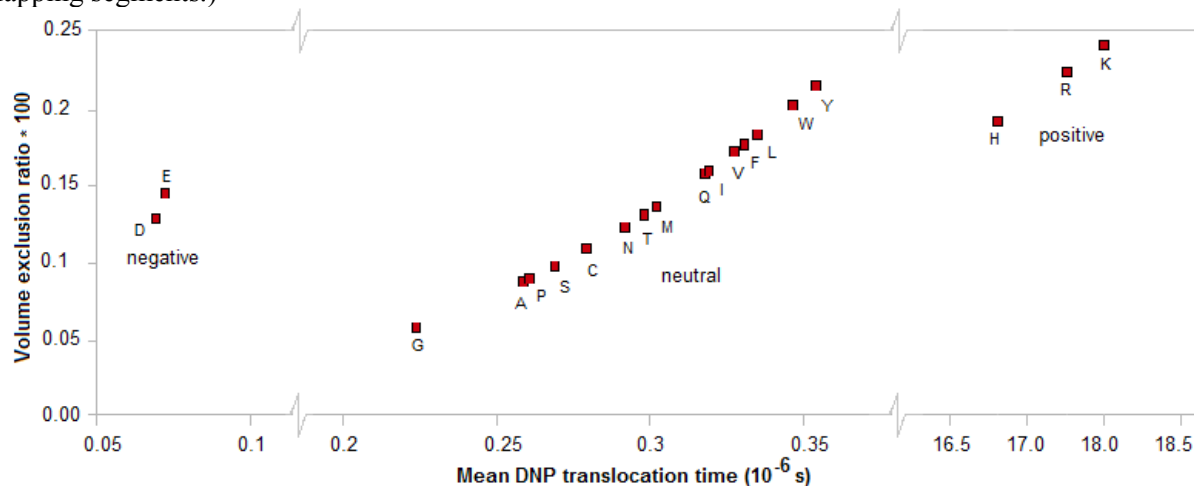

**Figure 2.** Scatter chart of mean of translocation time of particle in a tandem cell from time of entry into DNP (length  $L_{34} = 10$  nm, negligible cross-section) to time of exit into *trans2* vs volume exclusion ratio.  $V_{05} = 0.365$  V,  $V_{34} = \sim 0.18$  V.

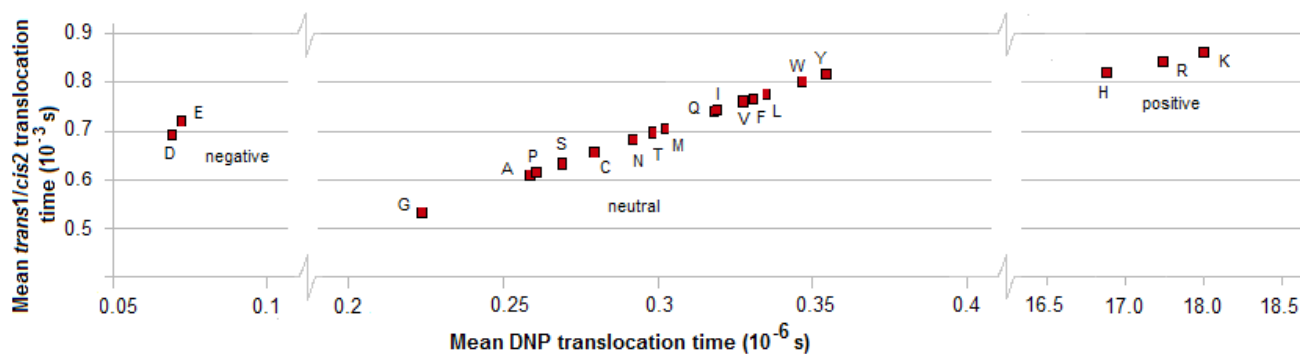

**Figure 3.** Scatter chart of mean of translocation time of particle from time of entry into DNP (length  $L_{34} = 10$  nm, negligible cross-section) to time of exit into *trans2* vs mean of time for particle to translocate from top of *trans1/cis2* (length  $L_{23} = 1$   $\mu$ m, cross-section area =  $1$   $\mu$ m<sup>2</sup>) to entrance of DNP.  $V_{05} = 0.365$  V,  $V_{23} = \sim 1.6$  mV,  $V_{34} = \sim 0.18$  V.

The discriminators described above are computed measures. The experimentally measurable quantities are somewhat different. Thus,

- 1) Rather than  $T_{trans1/cis2}$  what is measured is the inter-arrival time between successive residues arriving at the pore. This quantity is  $T_{trans1/cis2} + T_{gen}$ , where  $T_{gen}$  is the time for a residue to be generated at the top of *trans1/cis2* and is, like  $T_{trans1/cis2}$ , a random variable. In the tandem cell  $T_{gen}$  is replaced with the time  $T_c$  to cleave a residue from a peptide; see below. The inter-arrival time thus contains more information than  $T_{trans1/cis2}$  because the generation/cleaving time may vary with the amino acid;
- 2) The time spent by a residue inside DNP is more than the translocation time  $T_{DNP}$  because of the additional dwell time due to the reaction of the residue with the pore wall (which in a biological pore is a protein that may contain charged residues). Thus positively charged residues in the lumen will slow down negatively charged cleaved residues and vice versa, but neutral cleaved residues are not affected either way. Additional dwell time may occur if a chemical adapter (similar to cyclodextrin in DNA sequencing [22]) is used to slow down the

residue;

3) Current blockade, which reflects the change in the amplitude of the pore current from the baseline value, is, as mentioned above, determined by many more factors than volume exclusion. An important one is the presence of charged residues in the pore lumen (often by design; see, for example, [26]). The resulting electro-osmotic force may have a significant effect on the blockade level.

It remains to be seen if wet experiments with free amino acids in a tandem cell or single electrolytic cell will confirm (or not) the grouping and ordering seen in Figures 2 and 3.

### 5.3 Order of arrival of residue at DNP, occupancy in DNP, minimum cleaving interval for exopeptidase

Two conditions need to be satisfied for accurate sequencing:

a) cleaved residues must enter DNP in natural order;

b) no more than one residue may occupy DNP at any time.

These conditions can be used to determine the minimum cleaving interval between residues that are successively cleaved by the exopeptidase. Since cleaving is a stochastic process and will vary with the amino acid, let  $T_{c,\min-X}$  and  $T_{c,\max-X}$  be the minimum and maximum cleaving times for amino acid X.

*Condition a.* Let residue  $X_1$  be cleaved at time  $t = 0$ . Its mean translocation time through *trans1/cis2* is  $E(T_{trans1/cis2-X_1})$  and standard deviation is  $\sigma_{trans1/cis2-X_1}$ . The next residue  $X_2$  is cleaved no earlier than  $t = T_{c,\min-X_2}$ . Assuming  $6\sigma$  support for the distribution,  $X_1$  arrives at the entrance to DNP latest by  $t = E(T_{trans1/cis2-X_1}) + 3\sigma_{trans1/cis2-X_1}$ . The earliest that  $X_2$  can arrive at DNP is  $t = T_{c,\min-X_2} + \max(0, E(T_{trans1/cis2-X_2}) - 3\sigma_{trans1/cis2-X_2})$ . Therefore for  $X_2$  to follow  $X_1$  requires

$$E(T_{trans1/cis2-X_1}) + 3\sigma_{trans1/cis2-X_1} < T_{c,\min-X_2} + \max(0, E(T_{trans1/cis2-X_2}) - 3\sigma_{trans1/cis2-X_2}) \quad (7)$$

From the data in Table 1 in the Appendix, columns 8 and 9 (mean translocation time and standard deviation for *trans1/cis2*),  $\max(0, E(T_{trans1/cis2-X_2}) - 3\sigma_{trans1/cis2-X_2}) = 0$  for any amino acid. Equation 7 reduces to

$$T_{c,\min-X} > \max_X \{ E(T_{trans1/cis2-X}) + 3\sigma_{trans1/cis2-X} \} \quad (8)$$

over all X. The maximum values occur for  $X = K$  (Lys), with  $E(T_{trans1/cis2-X}) = 0.8632 \times 10^{-3}$  and  $\sigma_{trans1/cis2-X} = 0.7077 \times 10^{-3}$ , leading to

$$T_{c,\min} = 2.9863 \text{ ms} \quad (9)$$

over all X.

*Condition b.* Consider residue  $X_1$  to be cleaved before  $X_2$ . Since condition (a) has to be satisfied,  $X_1$  arrives at the entrance to DNP before  $X_2$ . Let it arrive at time  $t = 0$ . The latest it can exit DNP is at time  $t = E(T_{DNP-X_1}) + 3\sigma_{DNP-X_1}$ . The earliest that  $X_2$  can arrive at the entrance of DNP is at  $t = T_{c,\min} + \max(0, E(T_{trans1/cis2-X_2}) - 3\sigma_{trans1/cis2-X_2}) = T_{c,\min}$ . Therefore for condition (b) to be satisfied

$$T_{c,\min} > E(T_{DNP-X_1}) + 3\sigma_{DNP-X_1} \quad (10)$$

From Table 1 (columns 6 and 7), the maximum of the right hand side in Equation 10 occurs once again for  $X_1 = K$  (Lys), with  $E(T_{DNP-X_1}) = 15.1215100 \times 10^{-6}$  and  $\sigma_{DNP-X_1} = 15.065294 \times 10^{-6}$ , leading to

$$T_{c,\min} = 6.0317 \times 10^{-5} \text{ s} \quad (11)$$

which is less than the value in Equation 9. Since Equation (9) has to be satisfied, it sets the minimum cleaving interval for any amino acid. (Thus Condition a subsumes Condition b.)

### 5.4 Behavior at an interface

The Fokker-Planck model mentioned above does not consider the behavior of the particle at the interface between two sections. In reality a particle oscillates at an interface because of diffusion. The effect of this on each type of residue, charged or not, is now considered.

a) *Negative residues* at the interface between *trans1/cis2* and DNP experience a positive drift field inside both regions. Using formal probabilistic arguments [6] it can be shown that with sufficiently large  $V_{05}$  a negative residue will eventually pass into DNP, such passage being aided indirectly by the reflecting boundaries in *trans1/cis2*. (A cleaved residue cannot regress into UNP as the remaining peptide blocks its passage.) The behavior at the interface between DNP and *trans2* is similar. The tapered geometry of *trans1/cis2* shown in Figure 1 aids passage into DNP. Similarly the abrupt increase in cross-section from DNP to *trans2* decreases the probability of a detected particle regressing into DNP from *trans2*.

b) *Positive residues* experience a negative drift field inside both regions. Because of this there is a non-zero probability that a positive residue may ultimately not enter DNP and therefore may be 'lost' to diffusion in *trans1/cis2*. Also on entering DNP it may be trapped inside and neither regress into *trans1/cis2* nor exit into *trans2*. One possible solution to the first problem is to design the pore lumen so as to prevent regression of the residue once it has entered DNP. One can also consider use of a hydraulic pressure gradient to prevent entry of a residue into DNP; however the hydrodynamic radius of an amino acid is too small for the pressure to have enough of a counteracting effect against the electric field. (Compare this with the behavior of polyethylene glycol (PEG) in a nanopore with combined electric field and hydraulic pressure gradients [19,20]: 12 kDa PEG molecules with a length of 0.35 nm have a hydrodynamic radius of 3.2 nm, which is  $\sim 10 \times$  average radius for an amino acid [24].) A third solution is to redo the sequencing using a second copy of the peptide with the voltage reversed (if the pore is ion-sensitive, one with the appropriate sense is to be used). In this case the roles of positive and negative residues are reversed. Thus positive residues are 'lost' to diffusion when  $V_{05} > 0$  while negative residues are 'lost' to diffusion when  $V_{05} < 0$ . (In the latter case the header and trailer must have the appropriate charge sign.) With this approach two sequences are obtained with some or all positive residues missing in one and some or all negative residues missing in the other. Since the neutral residues are not affected the correct sequence can be obtained by merging the two individual sequences. However a residue that is trapped inside DNP and clogs it will still pose a problem. In this case there appears to be no alternative to re-sequencing with another copy of the peptide.

c) *Neutral residues* at the interface between *trans1/cis2* and DNP are not affected by the electric field in either region. They are therefore subject entirely to diffusion. In this case the tapered geometry of *trans1/cis2* in Figure 1 is useful in promoting entry from *trans1/cis2* into DNP and also reduces the probability of permanent regression into *trans1/cis2* from DNP.

The behavior at the interface between DNP and *trans2* can be similarly understood, along with the fact that the abrupt change in diameter from DNP to *trans2* acts as a deterrent to regression from *trans2* into DNP.

### 5.5 Sample size requirements for reliable residue identification, confidence levels for a given sample size

The two time-based discriminators discussed above are mean values. To obtain a sample mean value which approaches the population (that is, calculated) mean for amino acid X, sequencing has to be done N (= sample size) times to distinguish the sample mean of X from that for another amino acid Z. The value of N, which depends on how close the mean translocation times of two amino acids are and the desired confidence level, can be calculated using standard formulas from statistics. Thus with a population mean E and standard deviation  $\sigma$ , margin of error e, and confidence level  $\alpha$  (equivalently percentile value =  $1 - \alpha/2$ ), the critical value  $Z_{\alpha/2}$  of the normal distribution can be obtained from tables or calculated using statistical software (R was used for the present work). The number of samples required for the sample mean E to approach the population mean is

$$N = Z_{\alpha/2}^2 \sigma^2 / e^2 \quad (12)$$

For example, with a confidence level of 0.95,  $\alpha$  is 0.05, the percentile is 97.5, and the critical value is 1.96.

Tables 2 and 3 in the Appendix give the required sample sizes for DNP and *trans1/cis2* for each amino acid X and its nearest neighbor (that is, the amino acid Z whose mean is closest to the mean of X) for three confidence levels: 90%, 80%, 70%.  $\sigma$  is taken from Table 1,  $e = \min |E_X - E_Z|$  where Z is the amino acid in column 6 or 8 with mean nearest to the mean for X. (This nearest neighbor can in almost all cases be identified visually in Figures 2 and 3, where the amino acids separate into ordered groups.) Figures 4 and 5 show histograms of the sample size for DNP and *trans1/cis2* respectively.

The value of N to use in the sequencing is the largest sample size  $N_{\max}$  over all the amino acids. In determining  $N_{\max}$  the discriminator to use for an amino acid is based on the smallest number of samples over all



its discriminators. For example, Asn (symbol N) has  $E(T_{\text{DNP}}) = \sim 0.273 \times 10^{-6}$  which is  $0.0055 \times 10^{-6}$  from the mean time of Thr (T) and requires  $\sim 27800$  samples to attain a confidence level of 90%. It has  $E(T_{\text{trans1/cis2}}) = 0.683 \times 10^{-3}$  which is  $0.005 \times 10^3$  from the mean time of Asp (D) and requires  $> 200000$  samples. The discriminator to use for Asn is therefore  $E(T_{\text{DNP}})$ .

Amino acid pairs whose mean times are very close to each other are the ones that effectively determine  $N_{\text{max}}$ . As seen from Tables 2 and 3 (or Figures 2 and 3) the problem pairs are Ala (A) - Pro (P), Gln (Q) - Ile (I), and Phe (F) - Val (V), all with N values close to  $10^6$  (DNP) or far in excess of it (*trans1/cis2*). A more manageable value of  $N_{\text{max}}$  is possible if these highly error-prone residue pairs are excluded from its determination. This lowers the confidence levels for their measured means but their identification can be handled through error correction (which is made easier by the ordering property; see Figures 2 and 3). This leads to  $N_{\text{max}} = \sim 81000$  for a confidence level of 90% or better for the other 14 amino acids, and  $\sim 32000$  for a confidence level of 70% or better. For a long peptide,  $N_{\text{max}}$  could in principle be lowered by a factor of  $L_{\text{pep}}/20$ , where  $L_{\text{pep}}$  is the length, because of repeats. (This assumes that the 20 amino acids occur in proteins with equal probability.)

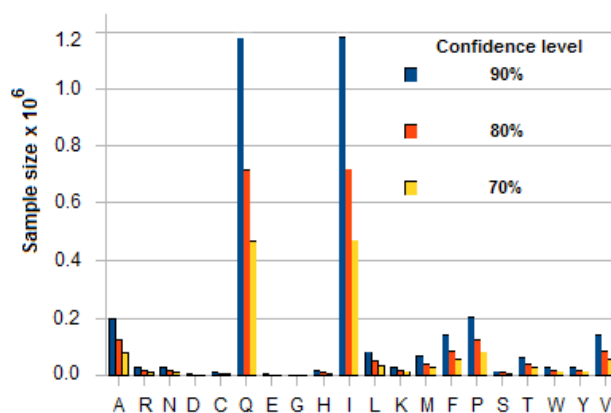

**Figure 4.** Sample sizes for three confidence levels using standard statistical formula for each amino acid based on standard deviation of its translocation time in DNP and the margin of error (= smallest difference between the amino acid's mean translocation time and that of any of the other 19). See Tables 1 and 2 in Appendix for calculated data.

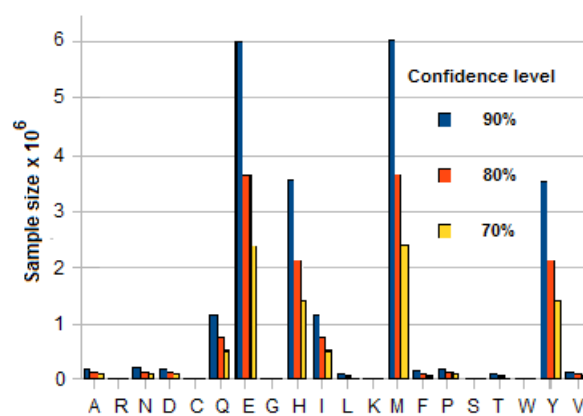

**Figure 5.** Sample sizes for three confidence levels using standard statistical formula for each amino acid based on standard deviation of its translocation time in *trans1/cis2* and the margin of error (= smallest difference between the amino acid's mean translocation time and that of any of the other 19). See Tables 1 and 3 in Appendix for calculated data.

Conversely for a given maximum number of samples  $N_{\text{max}}$  one can find the confidence level for the sample mean of an amino acid X to be no farther from the population mean than  $k \times e$ , where  $e$  is the distance to the nearest mean, with  $k < 0.5$ . This can be obtained from the critical value in a straightforward way using the statistical formula

$$Z_{\alpha/2} = (ke/\sigma) \sqrt{N_{\max}} \quad (13)$$

and tables (or the *pnorm* function in the software package R). For example, with DNP and  $N = 10000$  consider  $X = A$  (Ala) with  $\sigma = 0.199021 \times 10^{-6}$ . Its nearest mean neighbor  $Z = P$  (Pro) with distance to mean of  $Z = 0.001833 \times 10^{-6}$ . With  $k = 0.4$ ,  $ke = 0.4 \times 0.001833 \times 10^{-6}$ , and the resulting critical value  $Z_{\alpha/2} = 0.921$ , for which the confidence level is 0.8072513 (80.73%). Table 4 in the Appendix gives the confidence levels for the 20 amino acids for  $k = 0.4$  and  $N = 10000$  in DNP and *trans1/cis2*. Figure 6 shows a histogram of comparative confidence levels of residue identification in DNP and *trans1/cis2* for all 20 amino acids.

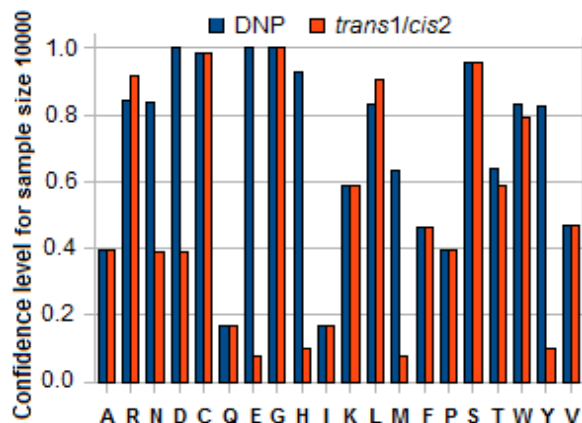

**Figure 6.** Histogram of confidence levels for an amino acid  $X$  to ensure that sample mean translocation time in DNP or *trans1/cis2* is within  $0.4 \times$  smallest difference between the calculated mean for  $X$  and that for any of the other 19 for a sample size of 10000. See Table 4 in Appendix.

Assuming ergodicity and the availability of a sufficient quantity of the assay sample a parallel implementation of  $N_{\max}$  tandem cells can be used with  $N_{\max}$  copies of the peptide to quickly obtain the sample mean for every residue in the peptide. Such an approach (which may have to be automated because of the large values of  $N_{\max}$  involved) would be more appropriate to research than to clinical or forensic assays where only a limited amount of the test sample may be available. Alternatively  $N \times$  sequencing with one copy of the peptide may be possible by recycling the cleaved residues after their detection in the tandem cell back into *cis1* for translocation through UNP and *trans1/cis2* to DNP for another round of detection. This recycling can be done  $N_{\max}$  times; it assumes that the recycled residues are not affected by the exopeptidase attached to UNP. For short peptides the value of  $N_{\max}$  can be set adaptively after the first few sample runs have yielded a tentative sequence. A tandem cell with recycling capability is currently being designed, details will be available later.

## 6 Discussion

The feasibility of the proposed scheme depends crucially on the exopeptidase being able to cleave every residue in the peptide in a reasonable amount of time. Assuming that this condition is satisfied, the following factors may be considered in a practical implementation:

- 1) With translocation times through DNP on the order of  $10^{-7}$  s (see Table 1), the bandwidth required is  $\sim 10$  MHz (including noise filtering). The lower signal-to-noise ratio in this frequency range combined with the pA-level blockade levels and fast translocation makes detection difficult (this is a problem in nanopore-based sequencing of any analyte, including DNA). Methods to slow down translocation in a tandem cell are discussed in [6]. Another method described in the literature uses the presence of charged residues in the pore lumen to slow down a translocating charged analyte [26]. Thus positively charged residues in the lumen will slow down negatively charged analyte residues and vice versa, but have no effect on neutral analytes.
- 2) As noted earlier a variety of methods based on Hidden Markov Models, Viterbi algorithms, and complex neural nets [17,18] have been used to increase base calling accuracy in strand sequencing of DNA. These methods, which are largely designed to work with the current blockade level, can be modified to work with multiple discriminators (Section 5.1) to improve residue calling accuracy.
- 3) The proposed scheme assumes that with amino (carboxyl) exopeptidase the peptide enters UNP N-terminal (C-terminal) first. There is no guarantee that this will happen. Entry of the wrong end can be detected when

cleaving fails to occur, as recognized by the absence of the characteristic blockades that would occur due to cleaved residues. In this case the intact peptide entering *trans2* can be recycled to *cis1* for another attempt at detection, to be repeated until residue-driven blockades are detected. With two identical copies of the peptide, two sequencers, one with amino exopeptidase and the other with carboxyl, can be used to increase the probability of successful sequencing. An alternative approach that dispenses with any dependence on the peptide's random orientation when entering DNP may be based on two tandem cells in tandem, the first with amino exopeptidase and the second with carboxyl. The device would then have the structure [*cis1*, UNP with amino peptidase, *trans1/cis2*, DNP with carboxyl peptidase, *trans2/cis3*, third (sensing) nanopore (TNP), *trans3*]. To guarantee detection in the second stage of a peptide that was not sequenced in DNP because it entered UNP C-terminal first, the unsequenced polymer has to enter DNP C-terminal first. This can be ensured if the poly-X leader (which entered UNP C-terminal first) is longer than the length of *trans1/cis2* so that the trailing polymer is still inside UNP and the leader (with its free C-terminal in front) enters DNP C-terminal first. (High enough voltages that are within the breakdown limit can ensure such entry. Up to 0.7 V can be applied across a biological nanopore of length 10 nm [6].) This ensures that the leading residue is cleaved by the carboxyl exopeptidase attached to the downstream side of DNP. When sequencing occurs in the first stage spurious signals arising from cleaved residues that try to enter TNP after detection in DNP can be avoided by flushing them out after they have entered *trans2* (thus effectively deactivating TNP). Yet another possible (and somewhat simpler, although it requires an additional step) alternative is to attach a capping molecule (similar to a biotin-streptavidin tether [27]) to the trailer at either the C-end or N-end of the peptide to prevent that end from entering UNP.

4) It is possible for some neutral residues to attract ions in an electrolyte and carry a resulting charge [19,28]. A cleaved residue that is ordinarily neutral can therefore become positively or negatively charged due to formation of an anion or cation complex. No information is available about whether amino acids form such complexes in aqueous KCl or not, so this line of investigation has not been pursued.

5) The tandem cell approach to peptide sequencing as described above is a destructive process since the peptide is broken down into its constituent amino acids. Unlike exonuclease-based DNA sequencing, where re-sequencing of the original strand from the cleaved bases can be done using the individual cleaved nucleotides and a template with an enzyme motor attached to a nanopore [16], there is no simple way to re-synthesize the peptide that can be integrated with the tandem cell. However as noted toward the end of Section 5.5, by routing cleaved residues that have translocated into *trans2* after detection in DNP into a second tandem cell they can be sequenced in the latter  $N_{\max}$  times in a loop. Such re-sequencing can also be viewed as  $N \times$  coverage (something that is normally done for error checking, especially in genome sequencing).

6) For other implementation-related issues in sequencing with a tandem cell (such as voltage drift and bases/monomers that might stick to channel walls) and their possible resolution see discussion in [6].

7) The optimum peptide length handled by an efficient mass spectrometer is  $\sim 20$  [7]. Considerably higher lengths may be possible with a tandem cell if a practical version can be built that matches its theoretical performance.

#### *A note on other two-pore systems*

There are a few reported instances in the open literature or on the web of systems with two nanopores. One of these has two parallel pores bridging a single *cis-trans* pair (with the structure [*cis*, P1-P2, *trans*]) aimed at simultaneous analysis of two different DNA samples and is described in a patent document [29]. In [30] the company Oxford Nanopore describes efforts related to its strand sequencing technique in which identical DNA samples translocate independently through a pair of pores ('poreA' and 'poreK') to yield a pair of non-correlated signal traces that are input to software designed to increase the accuracy of base calling. A commercial website [31] describes the use of two pores to control translocation of DNA with a time-varying potential difference that ratchets the DNA molecule back and forth through the two pores, leading to current variations that are used in base identification. A fourth study [32] describes the use of two pores in tandem (the term 'stacked', rather than tandem, is used) aimed at measuring the free-solution mobility of DNA molecules based on their "time-of-flight" between the two pores. More recently two nanopores in series have been used to measure mobility and particle sizes to identify specific proteins, but the nanopores are comparatively larger, with cross-section dimensions that are several 10's of nanometers [33]. The first four systems focus on DNA and do not appear to involve peptides. All five are structurally and procedurally different from the tandem cell described here and in [6].

## References

- [1] J. J. Kasianowicz, E. Brandin, D. Branton, and D. W. Deamer, "Characterization of individual polynucleotide molecules using a membrane channel," *PNAS*, 1996, **93**, 13770-13773.
- [2] J. Clarke, H.-C. Wu, L. Jayasinghe, A. Patel, S. Reid and H. Bayley, "Continuous base identification for single-molecule nanopore DNA sequencing," *Nature Nanotech.*, 2009, **4**, 265-270.
- [3] M. Wanunu, "Nanopores: a journey towards DNA sequencing," *Phys Life Rev*, 2012, **9**, 125-158.
- [4] J. Quick, A. Quinlan, and N. Loman. "A reference bacterial genome dataset generated on the MinION portable single-molecule nanopore sequencer." *Gigascience*, 2014, **3**, 22-27.
- [5] W. Timp, A. M. Nice, E. M. Nelson, V. Kurz, K. Mckelvey, and G. Timp. "Think Small: Nanopores for Sensing and Synthesis." *IEEE Access*, 2014, **2**, 1396-1408.
- [6] G. Sampath, "A tandem cell for nanopore-based DNA sequencing with exonuclease," *RSC Adv.*, 2015, **5**, 167-171.
- [7] H. Steen and M. Mann. "The ABC'S (and XYZ's) of peptide sequencing." *Nature Reviews*, 2004, **5**, 699-711.
- [8] J. M. Berg, J. L. Tymoczko, and L. Stryer. *Biochemistry*, 5th edn. W H Freeman, New York, NY, 2002.
- [9] J. Nivala, D. B. Marks and M. Akeson, "Unfoldase-mediated protein translocation through an  $\alpha$ -hemolysin nanopore," *Nature Biotech.*, 2013, **31**, 247-250.
- [10] A. Oukhaled, L. Bacri, M. Pastoriza-Gallego, J-M. Betton, and J. Pelta, "Sensing Proteins through Nanopores: Fundamental to Applications," *ACS Chem. Biol.* 2012, **7**, 1935-1949.
- [11] J. Nivala, L. Mulrone, G. Li, J. Schreiber, and M. Akeson, "Discrimination among protein variants using an unfoldase-coupled nanopore," *ACS Nano*, 2014, **8**, 12365-12375.
- [12] C. B. Rosen, D. Rodriguez-Larrea, and H. Bayley, "Single-molecule site-specific detection of protein phosphorylation with a nanopore," *Nature Biotechnol.*, **32**, 2014, 179-81.
- [13] D. Wu, S. Bi, L. Zhang, and J. Yang. "Single-molecule study of proteins by biological nanopore sensors." *Sensors* **14**, 2014, 18211-18222.
- [14] Y. Zhao, B. Ashcroft, P. Zhang, H. Liu, S. Sen, W. Song, J. Im, B. Gyarfás, S. Manna, S. Biswas, C. Borges, and S. Lindsay, "Single-molecule spectroscopy of amino acids and peptides by recognition tunneling," *Nature Nanotech.*, 2014, **9**, 466-473.
- [15] Q. Zhao, J. Comer, V. Dimitrov, S. Yemenicioglu, A. Aksimentiev, and G. Timp, "Stretching and unzipping nucleic acid hairpins using a synthetic nanopore," *Nucl. Acids Res.* 2008, **36**, 1532-1541.
- [16] K. R. Lieberman, G. M. Cherf, M. J. Doody, F. Olasagasti, Y. Kolodji, and M. Akeson, "Processive replication of single DNA molecules in a nanopore catalyzed by phi29 DNA polymerase," *J. Am. Chem. Soc.* **132**, 17961-17972 (2010).
- [17] W. Timp, J. Comer, and A. Aksimentiev, "DNA base-calling from a nanopore using a Viterbi algorithm," *Biophysical J.* **102**, 2012, L37-L39.
- [18] A. H. Laszlo, I. M. Derrington, B. C. Ross, H. Brinkerhoff, A. Adey, I. C. Nova, J. M. Craig, K. W. Langford, J. M. Samson, R. Daza, K. Doering, J. Shendure, and J. H. Gundlach, "Decoding long nanopore sequencing reads of natural DNA," *Nature Biotechnol.*, 2014, **32**, 829-834.
- [19] B. Lu, D. P. Hoogerheide, Q. Zhao, H. Zhang, Z. Tang, D. Yu, and J. A. Golovchenko, "Pressure-controlled motion of single polymers through solid-state nanopores," *Nano Lett.*, 2013, **13**, 3048-3052.
- [20] D. P. Hoogerheide, B. Lu, and J. A. Golovchenko, "Pressure-voltage trap for DNA near a solid-state nanopore," *ACS Nano*, 2014, **8**, 7384-7391.
- [21] M. Schiel and Z. S. Siwy, "Diffusion and trapping of single particles in pores with combined pressure and dynamic voltage," *J. Phys. Chem. C*, 2014, **118**, 19214-19223.
- [22] A. Banerjee, E. Mikhailova, S. Cheley, L-Q. Gu, M. Montoya, Y. Nagaoka, E. Gouaux, and H. Bayley, "Molecular bases of cyclodextrin adapter interactions with engineered protein nanopores," *PNAS*, 2010, **107**, 8165-8170.
- [23] H. W. Ch. Postma, "Rapid sequencing of individual DNA molecules in graphene nanogaps," *Nano Lett.* 2010, **10**, 420-425.
- [24] M. W. Germann, T. Turner, and S. A. Allison, "Translational diffusion constants of the amino acids: measurement by NMR and their use in modeling the transport of peptides," *J. Phys. Chem. A*, 2007, **111**, 1452-1455.
- [25] G. R. Asbury and H. H. Hill Jr., "Separation of amino acids by ion mobility spectrometry," *J. Chromatography A*, 2000, **902**, 433-437.
- [26] T. Z. Butler, M. Pavlenok, I. M. Derrington, M. Niederweis, and J. H. Gundlach, "Single-molecule dna detection with an engineered mspa protein nanopore," *PNAS*, 2008, **105**, 20647-20652.
- [27] L. Movileanu, S. Howorka, O. Braha, and H. Bayley, "Detecting protein analytes that modulate transmembrane movement of a polymer chain within a single protein pore," *Nature Biotech.*, 2000, **18**, 1091-1095.
- [28] J. E. Reiner, J. J. Kasianowicz, B. J. Nablo, and J. W. F. Robertson, "Theory for polymer analysis using nanopore-based single-molecule mass spectrometry," *PNAS*, 2010, **107**, 12080-12085.
- [29] P. J. van der Zaag, A. van de Stolpe, E. McCoo, and E. van van Wanrooij. U. S. Pat. No. 8784632B2, July 22, 2014.
- [30] <http://www.globalengage.co.uk/pgcasia/Brown.pdf>. (Accessed February 5, 2015)
- [31] <http://twoporeguys.com/technology.html>. (Accessed February 5, 2015)
- [32] M. Langecker, D. Pedone, F. C. Simmel, and U. Rant, "Electrophoretic time-of-flight measurements of single DNA molecules with two stacked nanopores," *Nano Lett.*, 2011, **11**, 5002-5007.
- [33] Z. D. Harms, D. G. Haywood, A. R. Kneller, L. Selzer, A. Zlotnick, and S. C. Jacobson, "Single-particle electrophoresis in nanochannels," *Anal. Chem.*, 2014, Article ASAP. (DOI: 10.1021/ac503527d)

## Appendix

|         |                                                                                                      |
|---------|------------------------------------------------------------------------------------------------------|
| Table 1 | Statistics of translocation times in DNP and <i>trans1/cis2</i> for amino acids                      |
| Table 2 | Sample sizes for three confidence levels (DNP) for amino acids                                       |
| Table 3 | Sample sizes for three confidence levels ( <i>trans1/cis2</i> ) for amino acids                      |
| Table 4 | Confidence level for sample mean of an amino acid to be within specified error for given sample size |
| Table 5 | For comparison: Statistics of translocation times in DNP and <i>trans1/cis2</i> for nucleotides      |

**Table 1**

| Amino acid | Abbrevn and Charge (a) | Hydrodynamic radius (b) $R_{aa}$ ( $10^{-10}$ m) | Diffusion coefficient (c) $D_{aa}$ ( $10^{-10}$ m <sup>2</sup> /s) | Mobility (d) $\mu_{aa}$ ( $10^{-8}$ m/Vs) | Mean translocation time in DNP (e) ( $10^{-6}$ s) | Std deviation of translocation time in DNP (f) ( $10^{-6}$ s) | Mean translocation time in <i>trans1/cis2</i> (g) ( $10^{-3}$ s) | Std deviation of translocation time in <i>trans1/cis2</i> (h) ( $10^{-3}$ s) | Volume exclusion ratio (i) ( $\times 100$ ) |
|------------|------------------------|--------------------------------------------------|--------------------------------------------------------------------|-------------------------------------------|---------------------------------------------------|---------------------------------------------------------------|------------------------------------------------------------------|------------------------------------------------------------------------------|---------------------------------------------|
| Ala        | A n                    | 2.6600                                           | 8.2052                                                             | 3.1950                                    | 0.2437490                                         | 0.199021                                                      | 0.6093730                                                        | 0.4975510                                                                    | 0.086291                                    |
| Arg        | R +                    | 3.6000                                           | 6.0627                                                             | 2.3607                                    | 14.7526920                                        | 14.697848                                                     | 0.8421130                                                        | 0.6904320                                                                    | 0.219551                                    |
| Asn        | N n                    | 2.9800                                           | 7.3241                                                             | 2.8519                                    | 0.2730730                                         | 0.222963                                                      | 0.6826810                                                        | 0.5574070                                                                    | 0.122299                                    |
| Asp        | D -                    | 3.0200                                           | 7.2271                                                             | 2.8141                                    | 0.0677110                                         | 0.033888                                                      | 0.6776980                                                        | 0.5510350                                                                    | 0.127425                                    |
| Cys        | C n                    | 2.8600                                           | 7.6314                                                             | 2.9715                                    | 0.2620760                                         | 0.213984                                                      | 0.6551910                                                        | 0.5349610                                                                    | 0.107778                                    |
| Gln        | Q n                    | 3.2300                                           | 6.7572                                                             | 2.6311                                    | 0.2959810                                         | 0.241668                                                      | 0.7399530                                                        | 0.6041690                                                                    | 0.156806                                    |
| Glu        | E -                    | 3.1400                                           | 6.9509                                                             | 2.7066                                    | 0.0704010                                         | 0.035234                                                      | 0.7046270                                                        | 0.5729310                                                                    | 0.143695                                    |
| Gly        | G n                    | 2.3200                                           | 9.4076                                                             | 3.6632                                    | 0.2125930                                         | 0.173582                                                      | 0.5314840                                                        | 0.4339540                                                                    | 0.056826                                    |
| His        | H +                    | 3.4900                                           | 6.2538                                                             | 2.4351                                    | 14.3019160                                        | 14.248747                                                     | 0.8163820                                                        | 0.6693360                                                                    | 0.199341                                    |
| Ile        | I n                    | 3.2400                                           | 6.7363                                                             | 2.6230                                    | 0.2968980                                         | 0.242416                                                      | 0.7422440                                                        | 0.6060400                                                                    | 0.158312                                    |
| Leu        | L n                    | 3.3900                                           | 6.4383                                                             | 2.5070                                    | 0.3106430                                         | 0.253639                                                      | 0.7766070                                                        | 0.6340970                                                                    | 0.182135                                    |
| Lys        | K +                    | 3.6900                                           | 5.9148                                                             | 2.3031                                    | 15.1215100                                        | 15.065294                                                     | 0.8631660                                                        | 0.7076930                                                                    | 0.237124                                    |
| Met        | M n                    | 3.0800                                           | 7.0863                                                             | 2.7593                                    | 0.2822360                                         | 0.230445                                                      | 0.7055900                                                        | 0.5761120                                                                    | 0.135391                                    |
| Phe        | F n                    | 3.3500                                           | 6.5151                                                             | 2.5369                                    | 0.3069780                                         | 0.250646                                                      | 0.7674440                                                        | 0.6266150                                                                    | 0.175553                                    |
| Pro        | P n                    | 2.6800                                           | 8.1439                                                             | 3.1711                                    | 0.2455820                                         | 0.200517                                                      | 0.6139550                                                        | 0.5012920                                                                    | 0.088293                                    |
| Ser        | S n                    | 2.7600                                           | 7.9079                                                             | 3.0792                                    | 0.2529130                                         | 0.206502                                                      | 0.6322820                                                        | 0.5162560                                                                    | 0.096624                                    |
| Thr        | T n                    | 3.0400                                           | 7.1795                                                             | 2.7956                                    | 0.2785710                                         | 0.227452                                                      | 0.6964270                                                        | 0.5686300                                                                    | 0.130043                                    |
| Trp        | W n                    | 3.5000                                           | 6.2359                                                             | 2.4282                                    | 0.3207230                                         | 0.261869                                                      | 0.8018070                                                        | 0.6546730                                                                    | 0.201122                                    |
| Tyr        | Y n                    | 3.5700                                           | 6.1136                                                             | 2.3806                                    | 0.3271370                                         | 0.267106                                                      | 0.8178430                                                        | 0.6677660                                                                    | 0.213903                                    |
| Val        | V n                    | 3.3200                                           | 6.5740                                                             | 2.5598                                    | 0.3042290                                         | 0.248402                                                      | 0.7605710                                                        | 0.6210040                                                                    | 0.170728                                    |

(a) n = neutral (b) Values from [24] (c), (d) Values computed from Equation 6 in main text  
 (e), (f), (g), (h) Values computed from Equations 1-4 in main text (i) Values computed from Equation 5 in main text;  $L = L_{34} = 10$  nm,  $r = 1.5$  nm

**Table 2**

| DNP        |                        | Confidence level = 0.9             |             | Confidence level = 0.8             |             | Confidence level = 0.7             |             |
|------------|------------------------|------------------------------------|-------------|------------------------------------|-------------|------------------------------------|-------------|
| Amino Acid | Nearest Amino Acid (a) | Difference in means ( $10^{-6}$ s) | Sample size | Difference in means ( $10^{-6}$ s) | Sample size | Difference in means ( $10^{-6}$ s) | Sample size |
| A          | P                      | 0.001833                           | 199346      | 0.001833                           | 121011      | 0.001833                           | 79147       |
| R          | K                      | 0.368818                           | 26854       | 0.368818                           | 16301       | 0.368818                           | 10662       |
| N          | T                      | 0.005498                           | 27809       | 0.005498                           | 16881       | 0.005498                           | 11041       |
| D          | E                      | 0.002690                           | 2683        | 0.002690                           | 1629        | 0.002690                           | 1065        |
| C          | S                      | 0.009163                           | 9221        | 0.009163                           | 5598        | 0.009163                           | 3661        |
| Q          | I                      | 0.000917                           | 1174449     | 0.000917                           | 712938      | 0.000917                           | 466296      |
| E          | D                      | 0.002690                           | 2901        | 0.002690                           | 1761        | 0.002690                           | 1151        |
| G          | A                      | 0.031156                           | 524         | 0.031156                           | 318         | 0.031156                           | 208         |
| H          | R                      | 0.450776                           | 16895       | 0.450776                           | 10256       | 0.450776                           | 6708        |
| I          | Q                      | 0.000917                           | 1181730     | 0.000917                           | 717358      | 0.000917                           | 469187      |
| L          | F                      | 0.003665                           | 80987       | 0.003665                           | 49162       | 0.003665                           | 32154       |
| K          | R                      | 0.368818                           | 28214       | 0.368818                           | 17127       | 0.368818                           | 11201       |

|   |   |          |        |          |        |          |       |
|---|---|----------|--------|----------|--------|----------|-------|
| M | T | 0.003665 | 66853  | 0.003665 | 40582  | 0.003665 | 26542 |
| F | V | 0.002749 | 140574 | 0.002749 | 85334  | 0.002749 | 55812 |
| P | A | 0.001833 | 202354 | 0.001833 | 122837 | 0.001833 | 80341 |
| S | P | 0.007331 | 13417  | 0.007331 | 8144   | 0.007331 | 5327  |
| T | M | 0.003665 | 65127  | 0.003665 | 39535  | 0.003665 | 25857 |
| W | Y | 0.006414 | 28186  | 0.006414 | 17110  | 0.006414 | 11191 |
| Y | W | 0.006414 | 29325  | 0.006414 | 17801  | 0.006414 | 11643 |
| V | F | 0.002749 | 138068 | 0.002749 | 83813  | 0.002749 | 54817 |

<sup>(a)</sup> Amino acid with closest mean translocation time

**Table 3**

| <i>trans1/cis2</i> |                                   | Confidence level = 0.9             |             | Confidence level = 0.8             |             | Confidence level = 0.7             |             |
|--------------------|-----------------------------------|------------------------------------|-------------|------------------------------------|-------------|------------------------------------|-------------|
| Amino Acid         | Nearest Amino Acid <sup>(a)</sup> | Difference in means ( $10^{-3}$ s) | Sample size | Difference in means ( $10^{-3}$ s) | Sample size | Difference in means ( $10^{-3}$ s) | Sample size |
| A                  | P                                 | 0.004582                           | 199388      | 0.004582                           | 121036      | 0.004582                           | 79163       |
| R                  | K                                 | 0.021053                           | 18186       | 0.021053                           | 11039       | 0.021053                           | 7220        |
| N                  | D                                 | 0.004983                           | 211591      | 0.004983                           | 128444      | 0.004983                           | 84008       |
| D                  | N                                 | 0.004983                           | 206781      | 0.004983                           | 125524      | 0.004983                           | 82099       |
| C                  | D                                 | 0.022507                           | 9553        | 0.022507                           | 5799        | 0.022507                           | 3792        |
| Q                  | I                                 | 0.002291                           | 1175984     | 0.002291                           | 713870      | 0.002291                           | 466905      |
| E                  | M                                 | 0.000963                           | 5985312     | 0.000963                           | 3633327     | 0.000963                           | 2376372     |
| G                  | A                                 | 0.077889                           | 524         | 0.077889                           | 318         | 0.077889                           | 208         |
| H                  | Y                                 | 0.001461                           | 3549136     | 0.001461                           | 2154469     | 0.001461                           | 1409127     |
| I                  | Q                                 | 0.002291                           | 1183278     | 0.002291                           | 718298      | 0.002291                           | 469802      |
| L                  | F                                 | 0.009163                           | 80978       | 0.009163                           | 49157       | 0.009163                           | 32151       |
| K                  | R                                 | 0.021053                           | 19107       | 0.021053                           | 11598       | 0.021053                           | 7586        |
| M                  | E                                 | 0.000963                           | 6051959     | 0.000963                           | 3673785     | 0.000963                           | 2402833     |
| F                  | V                                 | 0.006873                           | 140554      | 0.006873                           | 85322       | 0.006873                           | 55804       |
| P                  | A                                 | 0.004582                           | 202397      | 0.004582                           | 122863      | 0.004582                           | 80358       |
| S                  | P                                 | 0.018327                           | 13417       | 0.018327                           | 8145        | 0.018327                           | 5327        |
| T                  | E                                 | 0.008200                           | 81314       | 0.008200                           | 49361       | 0.008200                           | 32284       |
| W                  | H                                 | 0.014575                           | 34116       | 0.014575                           | 20710       | 0.014575                           | 13545       |
| Y                  | H                                 | 0.001461                           | 3532505     | 0.001461                           | 2144374     | 0.001461                           | 1402525     |
| V                  | F                                 | 0.006873                           | 138048      | 0.006873                           | 83800       | 0.006873                           | 54809       |

<sup>(a)</sup> Amino acid with closest mean translocation time

**Table 4**

| Amino Acid | DNP                               |                                    |                          |                  | <i>trans1/cis2</i>                |                                    |                          |                  |
|------------|-----------------------------------|------------------------------------|--------------------------|------------------|-----------------------------------|------------------------------------|--------------------------|------------------|
|            | Nearest Amino Acid <sup>(a)</sup> | Difference in means ( $10^{-6}$ s) | $Z_{a/2}$ <sup>(b)</sup> | Confidence level | Nearest Amino Acid <sup>(a)</sup> | Difference in means ( $10^{-3}$ s) | $Z_{a/2}$ <sup>(b)</sup> | Confidence level |
| A          | P                                 | 0.001833                           | 0.368403                 | 0.397634         | P                                 | 0.004582                           | 0.368364                 | 0.397595         |
| R          | K                                 | 0.368818                           | 1.003733                 | 0.844245         | K                                 | 0.021053                           | 1.219700                 | 0.915457         |
| N          | T                                 | 0.005498                           | 0.986352                 | 0.836958         | D                                 | 0.004983                           | 0.357584                 | 0.386933         |
| D          | E                                 | 0.002690                           | 3.175165                 | 0.999993         | N                                 | 0.004983                           | 0.361719                 | 0.391033         |
| C          | S                                 | 0.009163                           | 1.712838                 | 0.984578         | D                                 | 0.022507                           | 1.682889                 | 0.982686         |
| Q          | I                                 | 0.000917                           | 0.151778                 | 0.169957         | I                                 | 0.002291                           | 0.151679                 | 0.169848         |
| E          | D                                 | 0.002690                           | 3.053868                 | 0.999984         | M                                 | 0.000963                           | 0.067233                 | 0.075750         |
| G          | A                                 | 0.031156                           | 7.179546                 | 1.000000         | A                                 | 0.077889                           | 7.179471                 | 1.000000         |

|   |   |          |          |          |   |          |          |          |
|---|---|----------|----------|----------|---|----------|----------|----------|
| H | R | 0.450776 | 1.265447 | 0.926484 | Y | 0.001461 | 0.087310 | 0.098269 |
| I | Q | 0.000917 | 0.151310 | 0.169441 | Q | 0.002291 | 0.151211 | 0.169332 |
| L | F | 0.003665 | 0.577987 | 0.586298 | F | 0.009163 | 0.578019 | 0.586324 |
| K | R | 0.368818 | 0.979252 | 0.833908 | R | 0.021053 | 1.189951 | 0.907595 |
| M | T | 0.003665 | 0.636160 | 0.631702 | E | 0.000963 | 0.066862 | 0.075333 |
| F | V | 0.002749 | 0.438706 | 0.465021 | V | 0.006873 | 0.438738 | 0.465051 |
| P | A | 0.001833 | 0.365655 | 0.394924 | A | 0.004582 | 0.365615 | 0.394884 |
| S | P | 0.007331 | 1.420035 | 0.955381 | P | 0.018327 | 1.419993 | 0.955375 |
| T | M | 0.003665 | 0.644532 | 0.637971 | E | 0.008200 | 0.576825 | 0.585359 |
| W | Y | 0.006414 | 0.979727 | 0.834114 | H | 0.014575 | 0.890521 | 0.792109 |
| Y | W | 0.006414 | 0.960518 | 0.825656 | H | 0.001461 | 0.087516 | 0.098500 |
| V | F | 0.002749 | 0.442670 | 0.468705 | F | 0.006873 | 0.442702 | 0.468734 |

<sup>(a)</sup> Amino acid with closest mean translocation time

<sup>(b)</sup> Critical value of normal distribution

Discriminator data for nucleotides are given below for comparison.

**Table 5**

| Base | Nucleotide volume <sup>(a)</sup><br>$V_N$<br>( $10^{-30} \text{ m}^3$ ) | Hydrodynamic radius <sup>(b)</sup><br>$R_{aa}$<br>( $10^{-10} \text{ m}$ ) | Diffusion coefficient <sup>(c)</sup><br>$D_{aa}$<br>( $10^{-10} \text{ m}^2/\text{s}$ ) | Mobility <sup>(d)</sup><br>$\mu_{aa}$<br>( $10^{-8} \text{ m/Vs}$ ) | Mean translocation time in DNP <sup>(e)</sup><br>( $10^{-6} \text{ s}$ ) | Std deviation of translocation time in DNP <sup>(f)</sup><br>( $10^{-6} \text{ s}$ ) | Mean translocation time in <i>trans1/cis2</i> <sup>(g)</sup><br>( $10^{-3} \text{ s}$ ) | Std deviation of translocation time in <i>trans1/cis2</i> <sup>(h)</sup><br>( $10^{-3} \text{ s}$ ) | Volume exclusion ratio <sup>(j)</sup> |
|------|-------------------------------------------------------------------------|----------------------------------------------------------------------------|-----------------------------------------------------------------------------------------|---------------------------------------------------------------------|--------------------------------------------------------------------------|--------------------------------------------------------------------------------------|-----------------------------------------------------------------------------------------|-----------------------------------------------------------------------------------------------------|---------------------------------------|
| A    | 349                                                                     | 4.878957                                                                   | 4.473436                                                                                | 1.741885                                                            | 0.019994                                                                 | 0.019919                                                                             | 1.141287                                                                                | 0.935719                                                                                            | 0.412390                              |
| T    | 339                                                                     | 4.808550                                                                   | 4.538936                                                                                | 1.767390                                                            | 0.019705                                                                 | 0.019632                                                                             | 1.124817                                                                                | 0.922216                                                                                            | 0.399273                              |
| C    | 324                                                                     | 4.700962                                                                   | 4.642815                                                                                | 1.807839                                                            | 0.019264                                                                 | 0.019193                                                                             | 1.099650                                                                                | 0.901582                                                                                            | 0.379756                              |
| G    | 359                                                                     | 4.948362                                                                   | 4.410692                                                                                | 1.717454                                                            | 0.020278                                                                 | 0.020203                                                                             | 1.157522                                                                                | 0.949030                                                                                            | 0.425593                              |

(a) Volumes in column 2 from: M. Zwolak and M. DiVentra, "Physical approaches to DNA sequencing and detection," *Rev. Mod. Phys.*, 2008, **80**, 141-165.

(b) Calculated from ellipsoid of length  $7 \text{ \AA}$  (= length of stretched mononucleotide, same for all 4 types) and circular cross-section from volume in column 2

(c), (d) Values computed from Equation 6

(e), (f), (g), (h) Values computed from Equations 1-4 ( $V_{23} = 1.6 \text{ mV}$ ,  $V_{34} = 0.18 \text{ V}$ )

(j) Values computed from Equation 5 (DNP:  $L = L_{34} = 10 \text{ nm}$ ,  $r = 1.5 \text{ nm}$ ; *trans1/cis2*:  $L = L_{23} = 1 \text{ \mu m}$ ,  $r = 0.5 \text{ \mu m}$ )

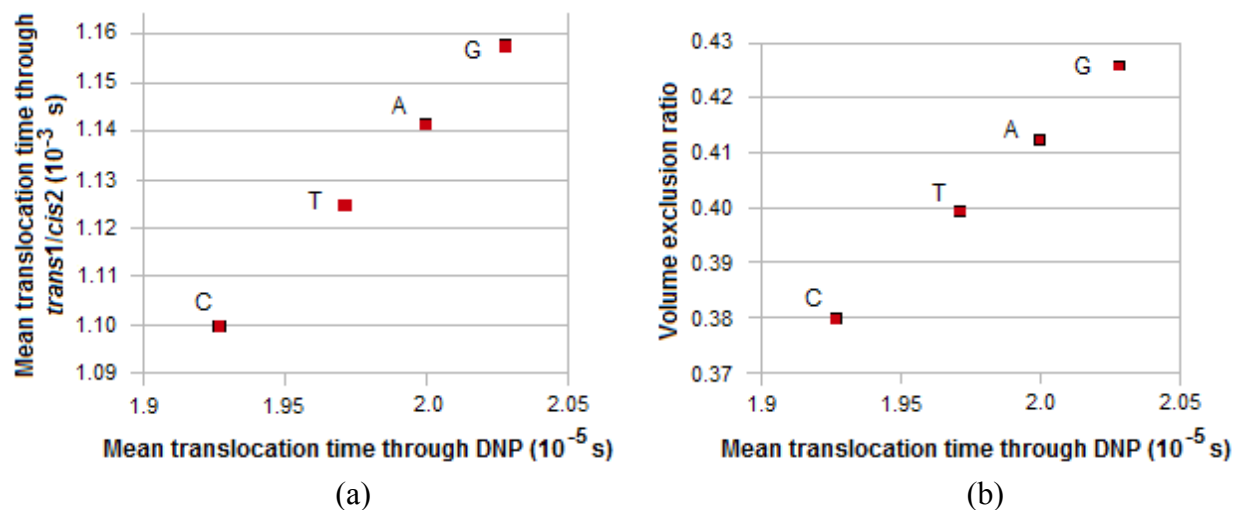

**Figure 7.** Scatter charts for nucleobases

a) translocation time through DNP vs translocation time through *trans1/cis2*

b) translocation time through DNP vs volume exclusion ratio
